# Supplementary material for: High‐throughput compound screen reveals mTOR inhibitors as potential therapeutics to reduce (auto)antibody production by human plasma cells
Source: PubMed Central journal article supplement (PMC6972998; doi:10.1002/eji.201948241), 2019-11-14
Supplement: EJI-50-73-s001.pdf [file EJI-50-73-s001.pdf]

# European Journal of Immunology

Supporting Information

for

DOI 10.1002/eji.201948241

Paul Tuijnenburg, Daan J. aan de Kerk, Machiel H. Jansen, Ben Morris, Cor Lieftink,  
Roderick L. Beijersbergen, Ester M.M. van Leeuwen and Taco W. Kuijpers

**High-throughput compound screen reveals mTOR inhibitors as potential  
therapeutics to reduce (auto)antibody production by human plasma cells**

## Supplemental Figures

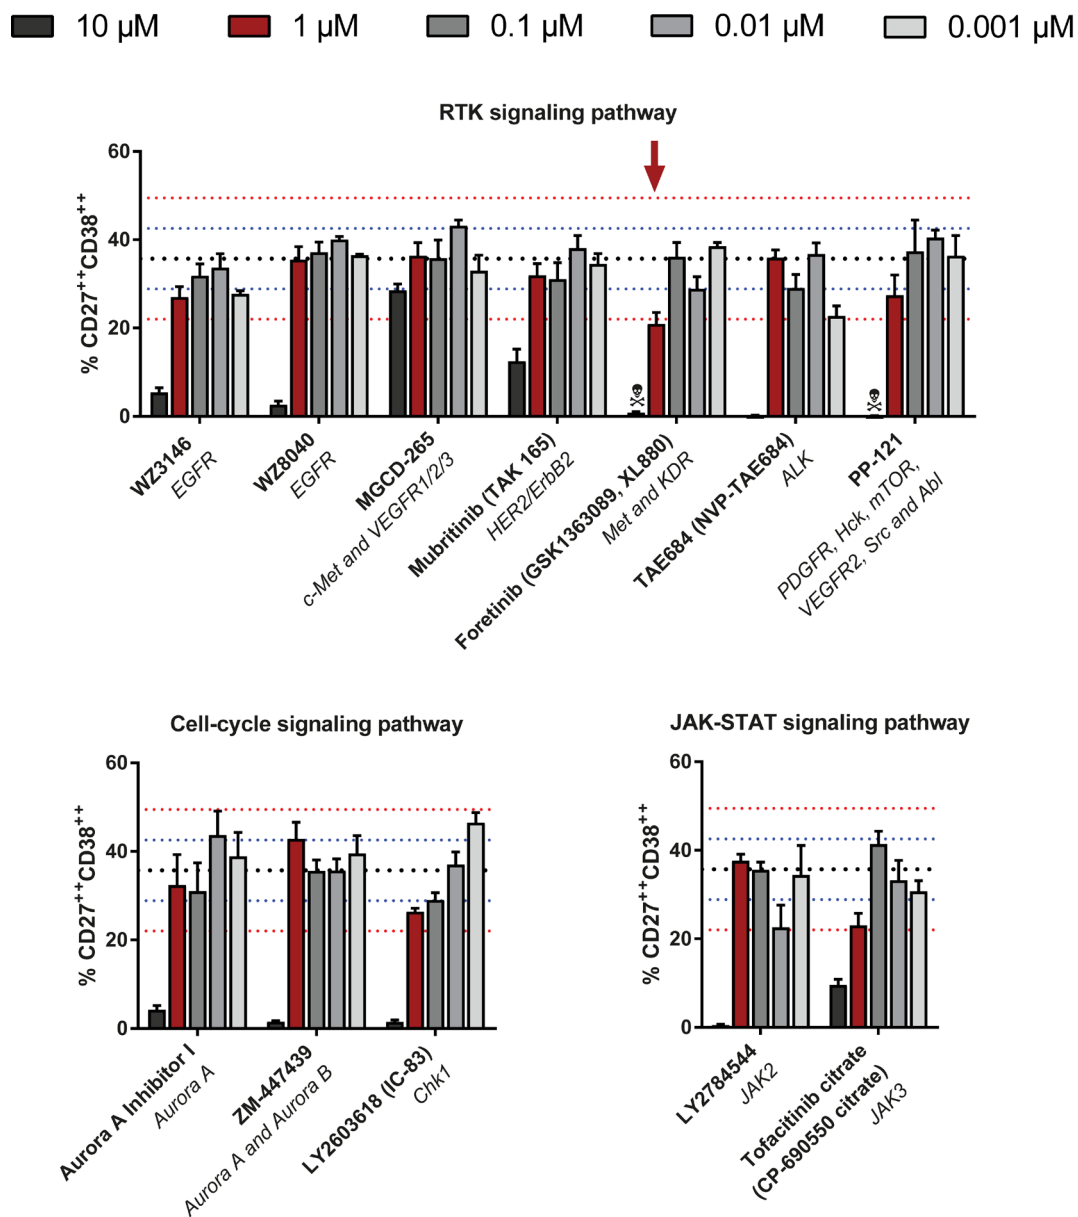

**Supplemental Figure 1. Validation of plasmablast-inhibiting compounds, additional pathways.** Shown are the pathways not displayed in Figure 2. Plasmablast-inhibiting compounds of the initial screening were validated in multiple concentrations around the initial dose of 1  $\mu$ M. Again, PBMCs were stimulated with CpG/IL-2 for 6 days. Plasmablasts were gated as CD19<sup>+</sup>CD20<sup>dim/+</sup>CD27<sup>++</sup>CD38<sup>++</sup>. *Black dotted line*: mean percentage of CD27<sup>++</sup>CD38<sup>++</sup> B cells after 6 days of CpG/IL-2 stimulation without compound ( $n=72$ ). *Blue dotted line*:  $\pm 1$  SD. *Red dotted line*:  $\pm 2$  SD. *Red arrow*: Percentage of CD27<sup>++</sup>CD38<sup>++</sup> B cells below -2 SD of CpG/IL-2 stimulated cells without compound at the concentration used in the initial screen (1  $\mu$ M). *Toxicity symbol*: Percentage of lymphocytes below -2 SD of CpG/IL-2 stimulated cells without compound.

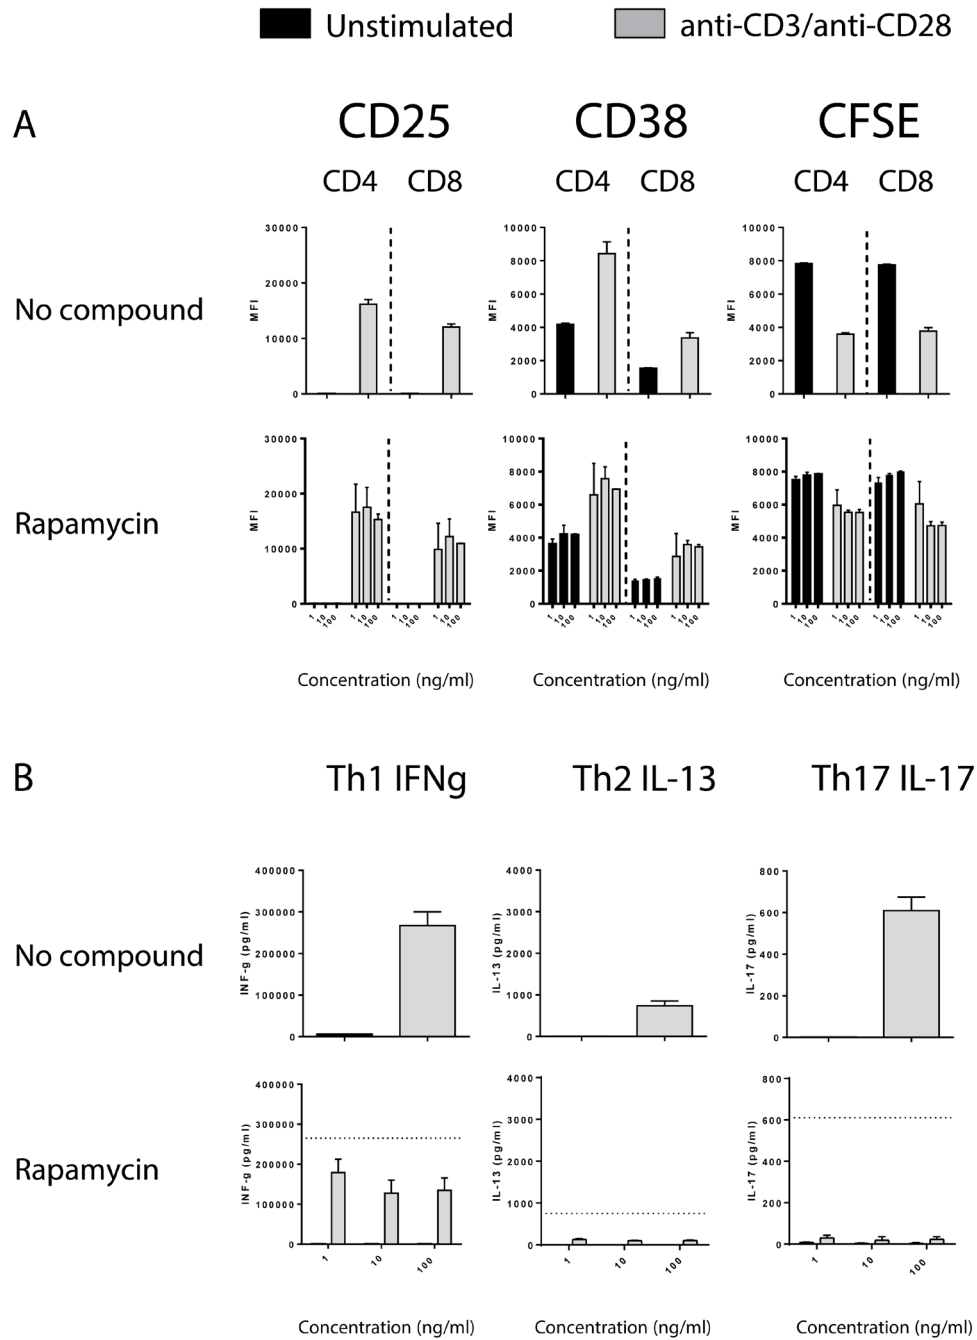

**Supplemental Figure 2. T cell effects of rapamycin.** T cell activation upon stimulation with the combination of anti-CD3/anti-CD28 with and without the addition of rapamycin **(A)** Proliferation by CFSE dilution and upregulation of activation markers CD25 and CD38, measured by MFI shown separately for CD4<sup>+</sup> and CD8<sup>+</sup> T cells. **(B)** ELISA of cytokine production (in pg/ml) in the supernatant of grouped control experiments ( $n=5$ ) and rapamycin ( $n=2$ ). IFN- $\gamma$ , IL-13 and IL-17, specific for Th1, Th2 and Th17 T cell subsets, respectively, are shown.

## algM/αCD40/IL-21 stimulation

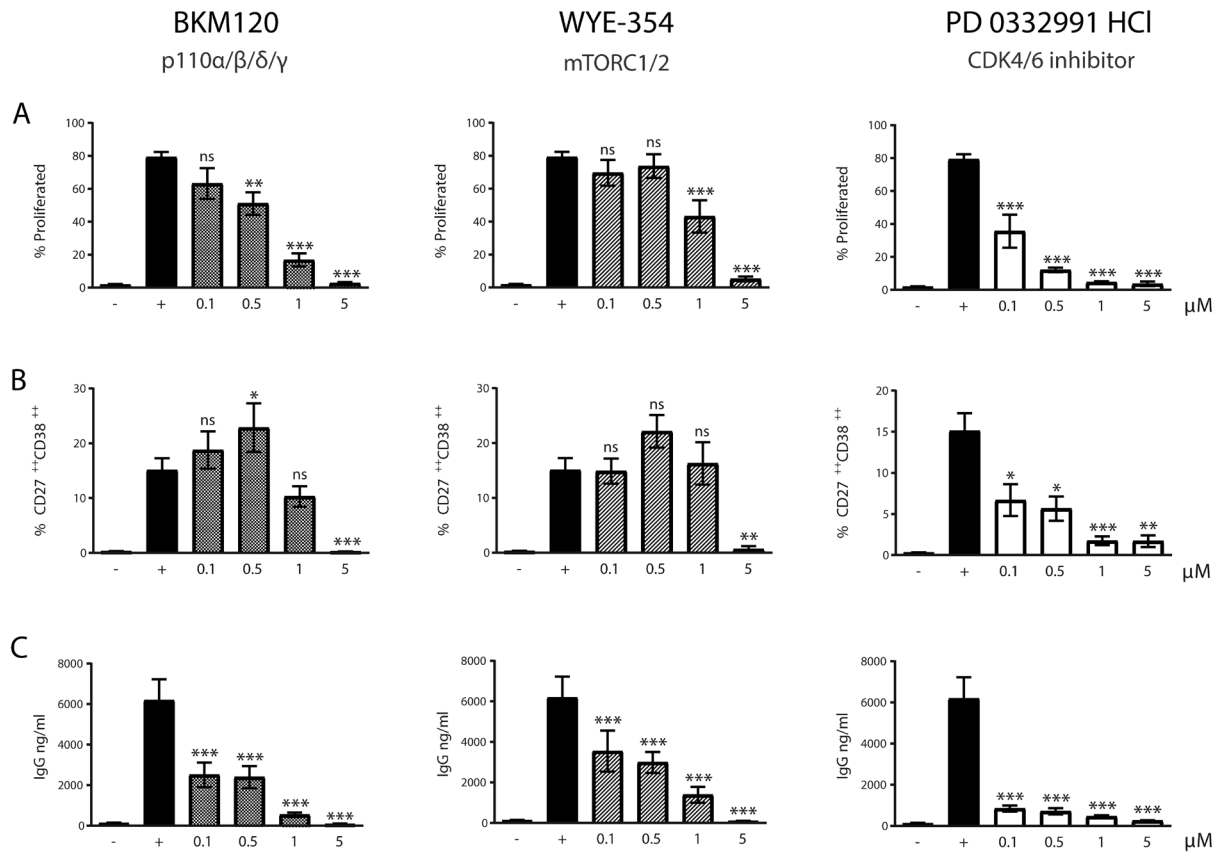

**Supplemental Figure 3. BKM120 and WYE-354 similarly reduce immunoglobulin production without reducing plasmablast formation upon T cell dependent activation signals.** Proliferation, plasmablast differentiation and immunoglobulin production for BKM120 (left), WYE-354 (middle) and PD 0332991 (right) after 6 days of anti-IgM/anti-CD40/IL-21 stimulation. Summary graphs of multiple flow cytometry experiments for (A) percentage proliferated B cells and (B) percentage CD27<sup>++</sup>CD38<sup>++</sup> plasmablasts. Immunoglobulin production measured by ELISA in 6-day culture supernatant for (C) IgG. Symbols: – unstimulated, + stimulated with anti-IgM/anti-CD40/IL-21. Mean ± SEM (for concentrations 0.1 - 1 μM *n*=6 to 10, concentration 5 μM *n*=4). P-values were determined by one-way ANOVA, *ns* not significant, \**P*≤0.05, \*\**P*≤0.01, \*\*\**P*≤0.001.

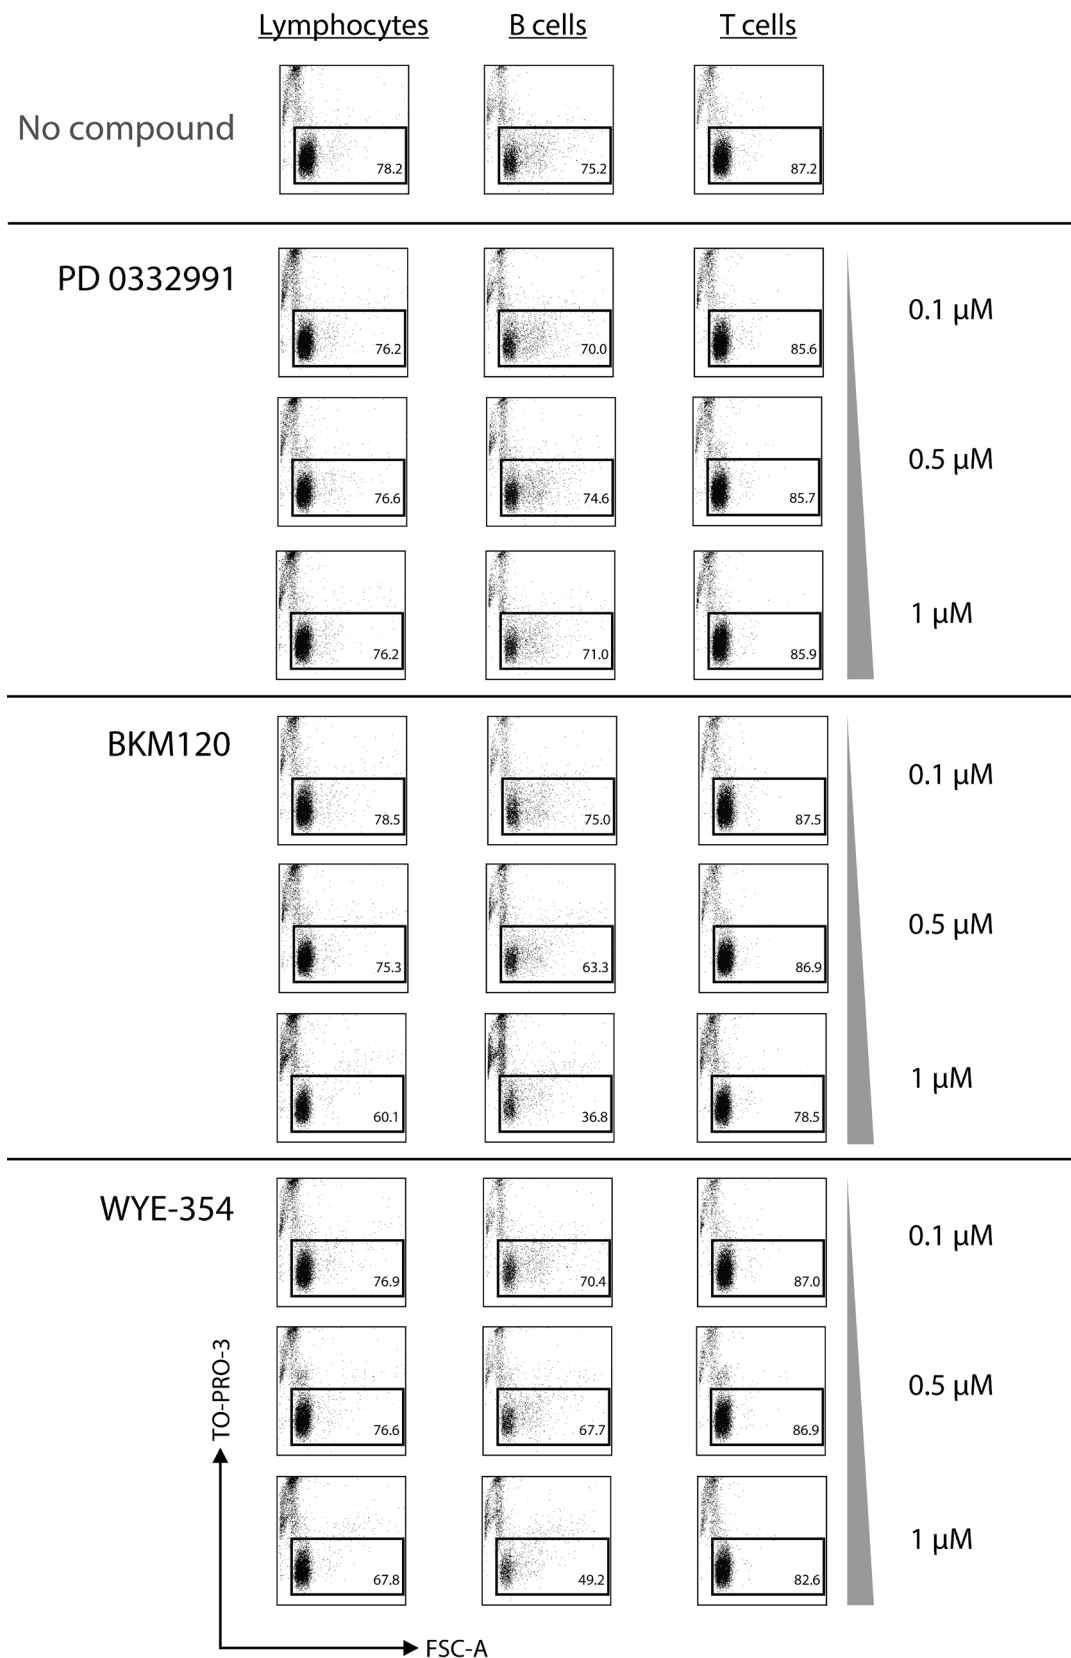

**Supplemental Figure 4. Cytotoxicity of compounds PD 0332991, BKM120 and WYE-354.** PBMCs were kept in culture for 6 days and different concentrations of compound were added, 0.1 – 1  $\mu$ M. TO-PRO-3 was measured as a read-out for cytotoxicity, gated on total lymphocytes, CD19<sup>+</sup> B cells or CD3<sup>+</sup> T cells.

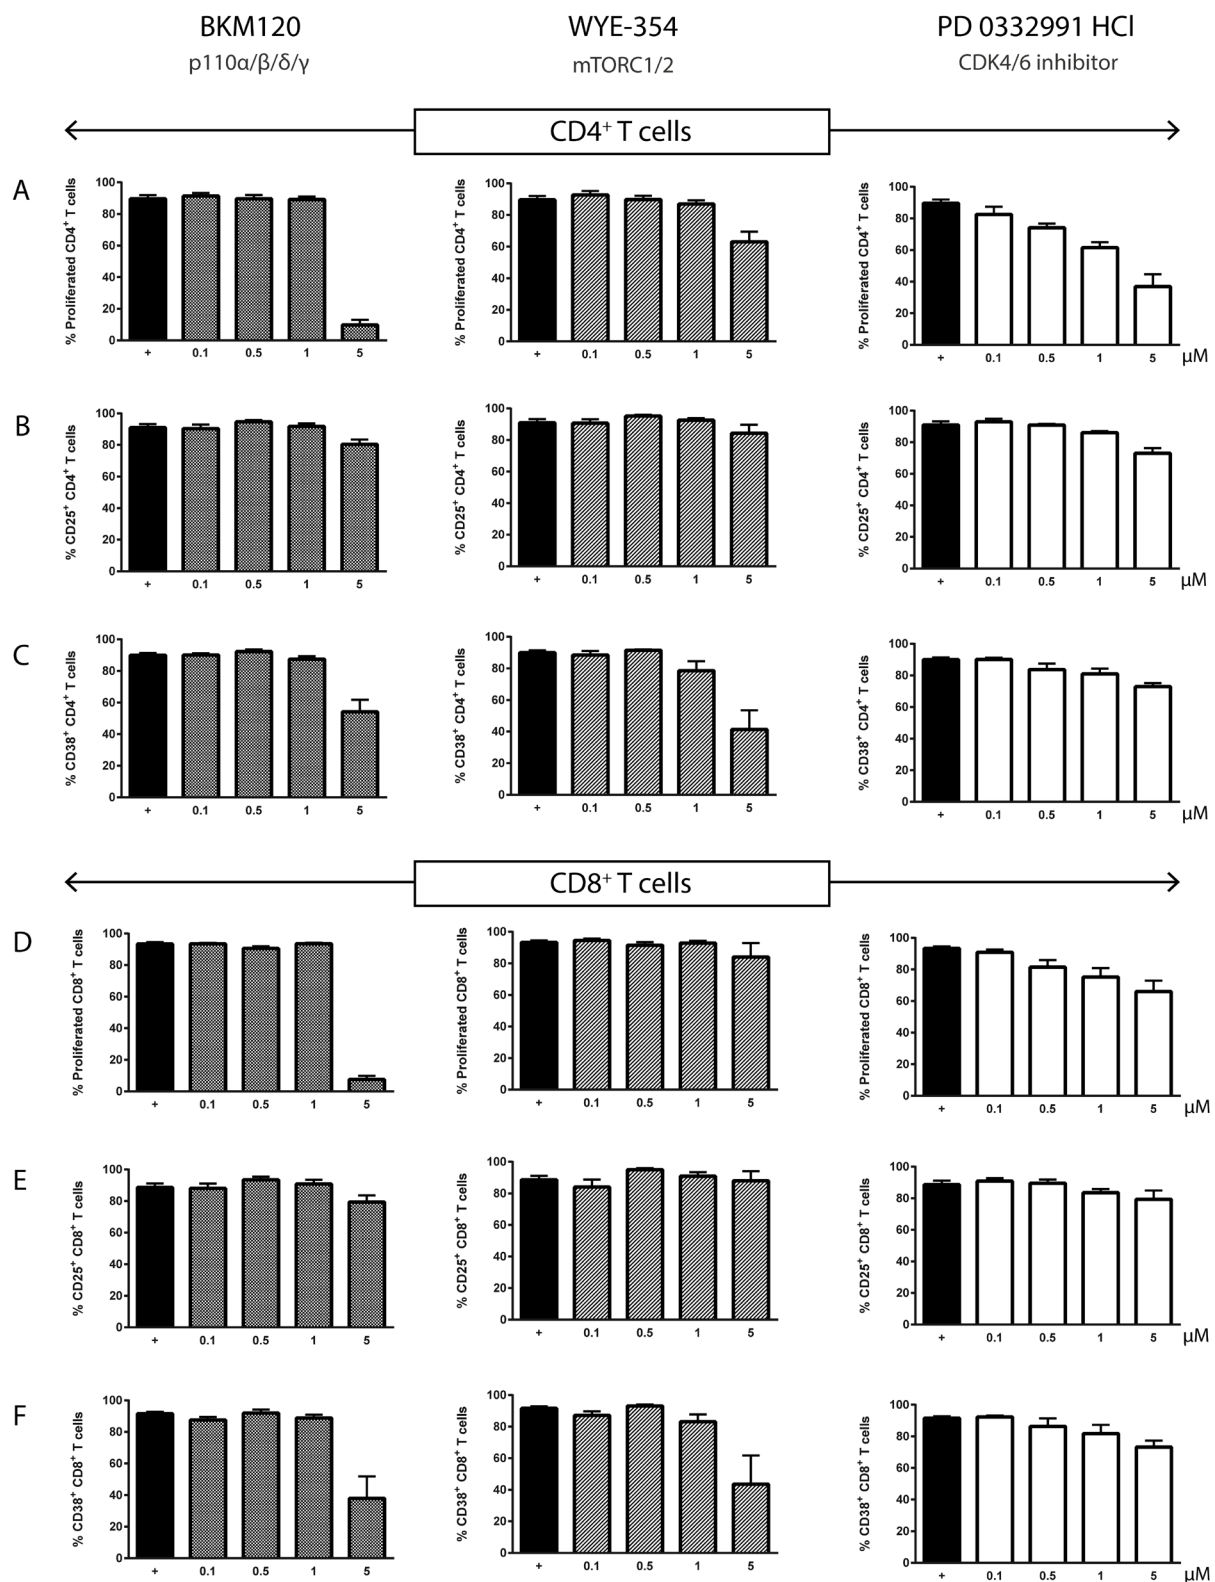

**Supplemental Figure 5. Effects on T cell proliferation and activation of PD 0332991, BKM120 and WYE-354 .** Effect of compounds on T cell proliferation (CFSE) and activation (CD25 and CD38) after 6 days of anti-CD3/anti-CD28 stimulated PBMCs with the addition of BKM120 (left), WYE-354 (middle) and PD 0332991 (right), shown separately for CD4<sup>+</sup> and CD8<sup>+</sup> T cells. Different concentrations of compound were added, 0.1 – 5 μM. Symbols: + stimulated with anti-CD3/anti-CD28. Mean ± SEM (for all concentrations  $n=4$  to 8).

Idelalisib  
p110 $\delta$

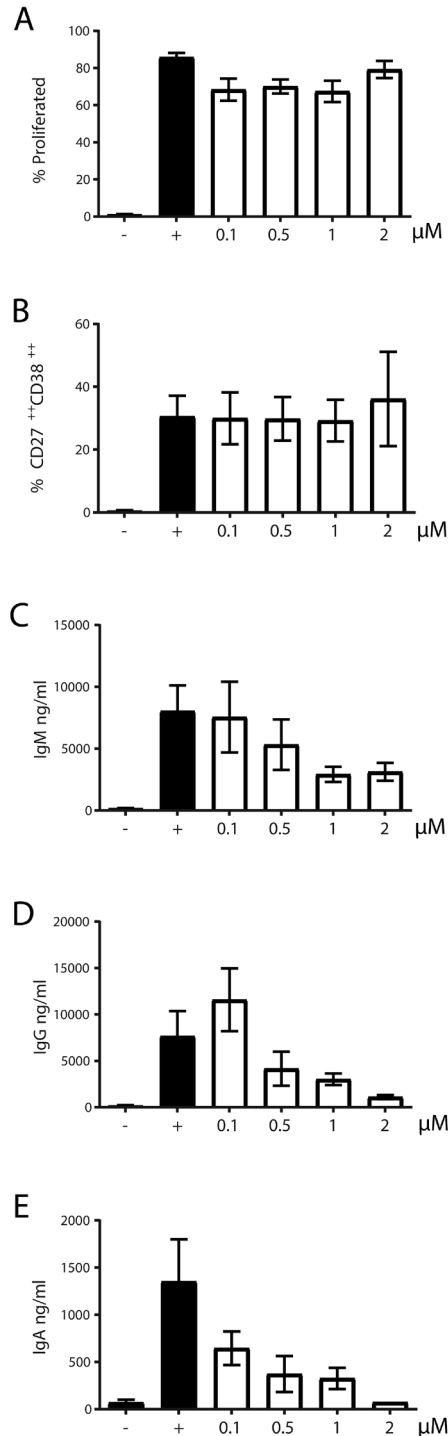

**Supplemental Figure 6. Idelalisib shows similar characteristics at lower concentrations as BKM120 and WYE-354.** Proliferation, plasmablast differentiation and immunoglobulin production for Idelalisib after 6 days of CpG/IL-2 stimulation. Summary graphs of multiple flow cytometry experiments for (A) percentage proliferated B cells and (B) percentage CD27<sup>++</sup>CD38<sup>++</sup> plasmablasts. Immunoglobulin production measured by ELISA in 6-day culture supernatant for (C) IgM, (D) IgG and (E) IgA. Symbols: - unstimulated, + stimulated with CpG/IL-2. Mean  $\pm$  SEM (for all concentrations  $n=3$  to 7).

## Supplemental Table

| Compound Names                         | Inhibits <sup>1</sup>                                                                     | Pathway                           |
|----------------------------------------|-------------------------------------------------------------------------------------------|-----------------------------------|
| A66                                    | p110 $\alpha$                                                                             | PI3K-AKT-mTOR-signaling           |
| A-674563                               | AKT1                                                                                      | PI3K-AKT-mTOR-signaling           |
| A-769662                               | reversible AMPK activator                                                                 | PI3K-AKT-mTOR-signaling           |
| AEE788 (NVP-AEE788)                    | EGFR and HER2/ErbB2                                                                       | JAK-STAT-signaling                |
| Afatinib (BIBW2992)                    | EGFR/HER2                                                                                 | JAK-STAT-signaling                |
| AG-490                                 | EGFT                                                                                      | JAK-STAT-signaling                |
| <b>AMG 900</b>                         | <b>pan-Aurora kinase</b>                                                                  | <b>Cell-cycle-signaling</b>       |
| Amuvatinib (MP-470)                    | C-Kit, PDGFR $\alpha$ and Flt3                                                            | Protein Tyrosine Kinase signaling |
| Apatinib (YN968D1)                     | VEGFR2                                                                                    | Angiogenesis-signaling            |
| AS-252424                              | PI3K $\gamma$                                                                             | PI3K-AKT-mTOR-signaling           |
| AS-604850                              | PI3K $\gamma$                                                                             | PI3K-AKT-mTOR-signaling           |
| AS-605240                              | PI3K $\gamma$                                                                             | PI3K-AKT-mTOR-signaling           |
| AS703026                               | MEK1/2                                                                                    | MAPK-signaling                    |
| AT7519                                 | multi-CDK                                                                                 | Cell-cycle-signaling              |
| <b>AT7867</b>                          | <b>AKT1/2/3 and p70S6K/PKA</b>                                                            | <b>PI3K-AKT-mTOR-signaling</b>    |
| <b>AT9283</b>                          | <b>JAK2/3</b>                                                                             | <b>JAK-STAT-signaling</b>         |
| <b>Aurora A Inhibitor I</b>            | <b>Aurora A</b>                                                                           | <b>Cell-cycle-signaling</b>       |
| Axitinib                               | VEGFR1, VEGFR2, VEGFR3                                                                    | Angiogenesis-signaling            |
| <b>AZ 960</b>                          | <b>JAK2</b>                                                                               | <b>JAK-STAT-signaling</b>         |
| AZD1480                                | JAK2                                                                                      | JAK-STAT-signaling                |
| AZD5438                                | CDK1/2/9                                                                                  | Cell-cycle-signaling              |
| AZD6244 (Selumetinib)                  | MEK1                                                                                      | MAPK-signaling                    |
| AZD7762                                | Chk1                                                                                      | Cell-cycle-signaling              |
| <b>AZD8055</b>                         | <b>mTOR</b>                                                                               | <b>PI3K-AKT-mTOR-signaling</b>    |
| <b>AZD8330</b>                         | <b>MEK1/2</b>                                                                             | <b>MAPK-signaling</b>             |
| AZD8931                                | EGFR, ErbB2 and ErbB3                                                                     | Angiogenesis-signaling            |
| <b>Barasertib (AZD1152-HQPA)</b>       | <b>Aurora B</b>                                                                           | <b>Cell-cycle-signaling</b>       |
| <b>BEZ235 (NVP-BEZ235)</b>             | <b>PI3K and mTOR</b>                                                                      | <b>PI3K-AKT-mTOR-signaling</b>    |
| BI 2536                                | Plk1                                                                                      | Cell-cycle-signaling              |
| BI6727 (Volasertib)                    | Plk1                                                                                      | Cell-cycle-signaling              |
| BIBF1120 (Vargatef)                    | VEGFR1/2/3, FGFR1/2/3 and PDGFR $\alpha$ / $\beta$                                        | Angiogenesis-signaling            |
| <b>BIRB 796 (Doramapimod)</b>          | <b>pan-p38 MAPK</b>                                                                       | <b>MAPK-signaling</b>             |
| BIX 02188                              | MEK5                                                                                      | MAPK-signaling                    |
| BIX 02189                              | MEK5                                                                                      | MAPK-signaling                    |
| <b>BKM120 (NVP-BKM120, Buparlisib)</b> | <b>p110<math>\alpha</math>/<math>\beta</math>/<math>\delta</math>/<math>\gamma</math></b> | <b>PI3K-AKT-mTOR-signaling</b>    |
| BMS 777607                             | c-Met, Axl, Ron and Tyro3                                                                 | Protein Tyrosine Kinase signaling |
| BMS 794833                             | Met/VEGFR2                                                                                | Protein Tyrosine Kinase signaling |
| BMS-599626 (AC480)                     | HER1 and HER2                                                                             | Protein Tyrosine Kinase signaling |
| <b>Bosutinib (SKI-606)</b>             | <b>Src/Abl</b>                                                                            | <b>Angiogenesis-signaling</b>     |
| BS-181 HCl                             | CDK7                                                                                      | Cell-cycle-signaling              |
| <b>CAL-101 (GS-1101)</b>               | <b>p110<math>\delta</math></b>                                                            | <b>PI3K-AKT-mTOR-signaling</b>    |
| CCT128930                              | AKT2                                                                                      | PI3K-AKT-mTOR-signaling           |
| CCT129202                              | Aurora A, Aurora B and Aurora C                                                           | Cell-cycle-signaling              |
| Cediranib (AZD2171)                    | VEGFR(KDR)                                                                                | Angiogenesis-signaling            |
| CHIR-99021 (CT99021)                   | GSK-3 $\alpha$ / $\beta$                                                                  | PI3K-AKT-mTOR-signaling           |
| CI-1033 (Canertinib)                   | pan-ErbB                                                                                  | Protein Tyrosine Kinase signaling |
| CI-1040 (PD184352)                     | MEK1/2                                                                                    | MAPK-signaling                    |



|                                      |                                                        |                                          |
|--------------------------------------|--------------------------------------------------------|------------------------------------------|
| CP-724714                            | HER2/ErbB2                                             | Angiogenesis-signaling                   |
| Crenolanib (CP-868596)               | PDGFR $\alpha$ / $\beta$                               | Angiogenesis-signaling                   |
| Crizotinib (PF-02341066)             | c-Met and ALK                                          | Protein Tyrosine Kinase signaling        |
| CX-4945                              | CK2 (casein kinase 2)                                  | Cell metabolism                          |
| <b>CYC116</b>                        | <b>Aurora A/B</b>                                      | <b>Cell-cycle-signaling</b>              |
| <b>Cyt387</b>                        | <b>JAK1/JAK2</b>                                       | <b>JAK-STAT-signaling</b>                |
| <b>Danusertib (PHA-739358)</b>       | <b>Aurora A/B/C</b>                                    | <b>Cell-cycle-signaling</b>              |
| Dasatinib (BMS-354825)               | Abl, Src and c-Kit                                     | Angiogenesis-signaling                   |
| DCC-2036 (Rebastinib)                | Abl1                                                   | Angiogenesis-signaling                   |
| <b>Deforolimus (Ridaforolimus)</b>   | <b>mTOR</b>                                            | <b>PI3K-AKT-mTOR-signaling</b>           |
| <b>ENMD-2076</b>                     | <b>Aurora A and Flt3</b>                               | <b>Angiogenesis-signaling</b>            |
| Enzastaurin (LY317615)               | PKC $\beta$                                            | TGF-beta/SMAD                            |
| Erlotinib HCl                        | EGFR                                                   | Angiogenesis-signaling                   |
| Everolimus (RAD001)                  | mTOR FKBP12                                            | PI3K-AKT-mTOR-signaling                  |
| Flavopiridol (Alvocidib)             | CDK1, CDK2, CDK4 and CDK6                              | Cell-cycle-signaling                     |
| Flavopiridol hydrochloride           | CDK1, CDK2, CDK4 and CDK6                              | Cell-cycle-signaling                     |
| <b>Foretinib (GSK1363089, XL880)</b> | <b>Met and KDR</b>                                     | <b>Protein Tyrosine Kinase signaling</b> |
| GDC-0879                             | B-Raf                                                  | MAPK-signaling                           |
| <b>GDC-0941</b>                      | <b>PI3K<math>\alpha</math>/<math>\delta</math></b>     | <b>PI3K-AKT-mTOR-signaling</b>           |
| GDC-0980 (RG7422)                    | PI3K $\alpha$ / $\beta$ / $\delta$ / $\gamma$          | PI3K-AKT-mTOR-signaling                  |
| Gefitinib (Iressa)                   | EGFR                                                   | Angiogenesis-signaling                   |
| GSK1059615                           | PI3K $\alpha$ / $\beta$ / $\delta$ / $\gamma$ and mTOR | PI3K-AKT-mTOR-signaling                  |
| <b>GSK1120212 (Trametinib)</b>       | <b>MEK1/2</b>                                          | <b>MAPK-signaling</b>                    |
| GSK1838705A                          | IGF-1R                                                 | Angiogenesis-signaling                   |
| GSK2126458                           | p110 $\alpha$ / $\beta$ / $\delta$ / $\gamma$          | PI3K-AKT-mTOR-signaling                  |
| <b>GSK461364</b>                     | <b>Plk1</b>                                            | <b>Cell-cycle-signaling</b>              |
| <b>Hesperadin</b>                    | <b>Aurora B</b>                                        | <b>Cell-cycle-signaling</b>              |
| <b>HMN-214</b>                       | <b>Plk1</b>                                            | <b>Cell-cycle-signaling</b>              |
| IC-87114                             | PI3K $\delta$                                          | PI3K-AKT-mTOR-signaling                  |
| Imatinib (Gleevec)                   | v-Abl, c-Kit and PDGFR                                 | Angiogenesis-signaling                   |
| Imatinib Mesylate                    | v-Abl, c-Kit and PDGFR                                 | Angiogenesis-signaling                   |
| Indirubin                            | GSK-3 $\beta$                                          | PI3K-AKT-mTOR-signaling                  |
| JNJ-38877605                         | c-Met                                                  | Protein Tyrosine Kinase signaling        |
| JNJ-7706621                          | pan-CDK                                                | Cell-cycle-signaling                     |
| Ki8751                               | VEGFR2                                                 | Angiogenesis-signaling                   |
| KRN 633                              | VEGFR1/2/3                                             | Angiogenesis-signaling                   |
| <b>Ku-0063794</b>                    | <b>mTORC1 and mTORC2</b>                               | <b>PI3K-AKT-mTOR-signaling</b>           |
| KU-55933                             | ATM                                                    | PI3K-AKT-mTOR-signaling                  |
| KU-60019                             | ATM                                                    | PI3K-AKT-mTOR-signaling                  |
| <b>KW 2449</b>                       | <b>Flt3</b>                                            | <b>Angiogenesis-signaling</b>            |
| <b>KX2-391</b>                       | <b>Src</b>                                             | <b>Angiogenesis-signaling</b>            |
| Lapatinib Ditosylate (Tykerb)        | EGFR and ErbB2                                         | Angiogenesis-signaling                   |
| LDN193189                            | BMP                                                    | TGF-beta/SMAD                            |
| Linifanib (ABT-869)                  | VEGFR/PDGFR                                            | Angiogenesis-signaling                   |
| <b>LY2228820</b>                     | <b>p38 MAPK</b>                                        | <b>MAPK-signaling</b>                    |
| <b>LY2603618 (IC-83)</b>             | <b>Chk1</b>                                            | <b>Cell-cycle-signaling</b>              |
| <b>LY2784544</b>                     | <b>JAK2</b>                                            | <b>JAK-STAT-signaling</b>                |
| LY294002                             | PI3K $\alpha$ / $\delta$ / $\beta$                     | PI3K-AKT-mTOR-signaling                  |
| Masitinib (AB1010)                   | Kit and PDGFR $\alpha$ / $\beta$                       | Protein Tyrosine Kinase signaling        |

|                                       |                                                                  |                                          |
|---------------------------------------|------------------------------------------------------------------|------------------------------------------|
| <b>MGCD-265</b>                       | <b>c-Met and VEGFR1/2/3</b>                                      | <b>Protein Tyrosine Kinase signaling</b> |
| MK-2206 dihydrochloride               | AKT1/2/3                                                         | PI3K-AKT-mTOR-signaling                  |
| <b>MLN8237 (Alisertib)</b>            | <b>Aurora A</b>                                                  | <b>Cell-cycle-signaling</b>              |
| Motesanib Diphosphate                 | VEGFR1/2/3                                                       | Angiogenesis-signaling                   |
| <b>Mubritinib (TAK 165)</b>           | <b>HER2/ErbB2</b>                                                | <b>Angiogenesis-signaling</b>            |
| Neratinib (HKI-272)                   | HER2 and EGFR                                                    | Angiogenesis-signaling                   |
| Nilotinib (AMN-107)                   | Bcr-Abl                                                          | Angiogenesis-signaling                   |
| NU7441(KU-57788)                      | DNA-PK                                                           | PI3K-AKT-mTOR-signaling                  |
| NVP-ADW742                            | IGF-1R                                                           | Protein Tyrosine Kinase signaling        |
| NVP-BHG712                            | EphB4                                                            | Protein Tyrosine Kinase signaling        |
| NVP-BSK805                            | JAK2                                                             | JAK-STAT-signaling                       |
| <b>ON-01910</b>                       | <b>PLK1</b>                                                      | <b>Cell-cycle-signaling</b>              |
| OSI-027                               | mTORC1 and mTORC2                                                | PI3K-AKT-mTOR-signaling                  |
| OSI-420 (Desmethyl Erlotinib)         | EGFR                                                             | Angiogenesis-signaling                   |
| OSI-930                               | Kit, KDR and CSF-1R                                              | Protein Tyrosine Kinase signaling        |
| Pazopanib HCl                         | VEGFR1, VEGFR2, VEGFR3                                           | Angiogenesis-signaling                   |
| <b>PCI-32765 (Ibrutinib)</b>          | <b>BTK</b>                                                       | <b>Angiogenesis-signaling</b>            |
| <b>PD 0332991 HCl</b>                 | <b>CDK4/6</b>                                                    | <b>Cell-cycle-signaling</b>              |
| PD0325901                             | MEK                                                              | MAPK-signaling                           |
| PD153035 HCl                          | EGFR                                                             | Angiogenesis-signaling                   |
| PD318088                              | MEK1/2                                                           | MAPK-signaling                           |
| PD98059                               | MEK                                                              | MAPK-signaling                           |
| Pelitinib (EKB-569)                   | EGFR                                                             | Angiogenesis-signaling                   |
| PF-00562271                           | FAK                                                              | Angiogenesis-signaling                   |
| PF-04217903                           | c-Met                                                            | Protein Tyrosine Kinase signaling        |
| PF-04691502                           | PI3K( $\alpha/\beta/\delta/\gamma$ )/mTOR                        | PI3K-AKT-mTOR-signaling                  |
| <b>PF-05212384 (PKI-587)</b>          | <b>PI3K<math>\alpha</math>, PI3K<math>\gamma</math> and mTOR</b> | <b>PI3K-AKT-mTOR-signaling</b>           |
| <b>PH-797804</b>                      | <b>p38<math>\alpha</math> MAPK</b>                               | <b>MAPK-signaling</b>                    |
| <b>PHA-680632</b>                     | <b>Aurora A, Aurora B and Aurora C</b>                           | <b>Cell-cycle-signaling</b>              |
| PHA-793887                            | CDK2, CDK5 and CDK7                                              | Cell-cycle-signaling                     |
| Phenformin hydrochloride              | AMPK                                                             | PI3K-AKT-mTOR-signaling                  |
| PI-103                                | p110 $\alpha/\beta/\delta/\gamma$                                | PI3K-AKT-mTOR-signaling                  |
| PIK-293                               | PI3K $\delta$                                                    | PI3K-AKT-mTOR-signaling                  |
| PIK-294                               | p110 $\delta$                                                    | PI3K-AKT-mTOR-signaling                  |
| PIK-75                                | p110 $\alpha$                                                    | PI3K-AKT-mTOR-signaling                  |
| PIK-90                                | PI3K $\alpha/\gamma/\delta$                                      | PI3K-AKT-mTOR-signaling                  |
| <b>PIK-93</b>                         | <b>PI4K (PI4KIII<math>\beta</math>)</b>                          | <b>PI3K-AKT-mTOR-signaling</b>           |
| PLX-4720                              | B-Raf                                                            | MAPK-signaling                           |
| <b>Ponatinib (AP24534)</b>            | <b>Abl, PDGFR<math>\alpha</math>, VEGFR2, FGFR1 and Src</b>      | <b>Angiogenesis-signaling</b>            |
| <b>PP-121</b>                         | <b>PDGFR, Hck, mTOR, VEGFR2, Src and Abl</b>                     | <b>Protein Tyrosine Kinase signaling</b> |
| <b>PP242</b>                          | <b>mTOR</b>                                                      | <b>PI3K-AKT-mTOR-signaling</b>           |
| Quercetin (Sophoretin)                | PI3K and SIRT1                                                   | PI3K-AKT-mTOR-signaling                  |
| <b>Quizartinib (AC220)</b>            | <b>FLT3</b>                                                      | <b>Angiogenesis-signaling</b>            |
| R406                                  | Syk                                                              | Angiogenesis-signaling                   |
| R406(free base)                       | Syk                                                              | Angiogenesis-signaling                   |
| R935788 (Fostamatinib disodium, R788) | Syk                                                              | Angiogenesis-signaling                   |
| <b>RAF265 (CHIR-265)</b>              | <b>C-Raf/B-Raf/B-Raf V600E</b>                                   | <b>MAPK-signaling</b>                    |
| Raf265 derivative                     | C-Raf/B-Raf/B-Raf V600E                                          | MAPK-signaling                           |

|                                                |                                               |                                          |
|------------------------------------------------|-----------------------------------------------|------------------------------------------|
| <b>Rapamycin (Sirolimus)</b>                   | <b>mTOR</b>                                   | <b>PI3K-AKT-mTOR-signaling</b>           |
| Regorafenib (BAY 73-4506)                      | VEGFR1/2/3 PDGFR $\beta$ , Kit, RET and Raf-1 | Protein Tyrosine Kinase signaling        |
| Roscovitine (Seliciclib, CYC202)               | Cdc2, CDK2 and CDK5                           | Cell-cycle-signaling                     |
| Saracatinib (AZD0530)                          | Src                                           | Angiogenesis-signaling                   |
| <b>SB 202190</b>                               | <b>MAPK</b>                                   | <b>MAPK-signaling</b>                    |
| SB 203580                                      | MAPK                                          | MAPK-signaling                           |
| SB 216763                                      | GSK-3                                         | PI3K-AKT-mTOR-signaling                  |
| SB 431542                                      | ALK5                                          | TGF-beta/SMAD                            |
| SB 525334                                      | ALK5                                          | TGF-beta/SMAD                            |
| SGX-523                                        | Met                                           | Protein Tyrosine Kinase signaling        |
| SNS-032 (BMS-387032)                           | CDK2                                          | Cell-cycle-signaling                     |
| <b>SNS-314</b>                                 | <b>Aurora A, Aurora B and Aurora C</b>        | <b>Cell-cycle-signaling</b>              |
| Sorafenib (Nexavar)                            | Raf-1, B-Raf and VEGFR-2                      | MAPK-signaling                           |
| SP600125                                       | JNK1, JNK2 and JNK3                           | MAPK-signaling                           |
| SU11274                                        | Met                                           | Protein Tyrosine Kinase signaling        |
| Sunitinib Malate (Sutent)                      | VEGFR2 (Flk-1) and PDGFR $\beta$              | Protein Tyrosine Kinase signaling        |
| <b>TAE684 (NVP-TAE684)</b>                     | <b>Alk</b>                                    | <b>Angiogenesis-signaling</b>            |
| TAK-733                                        | MEK1                                          | MAPK-signaling                           |
| <b>TAK-901</b>                                 | <b>Aurora A/B</b>                             | <b>Cell-cycle-signaling</b>              |
| Tandutinib (MLN518)                            | FLT3                                          | Angiogenesis-signaling                   |
| Telatinib (BAY 57-9352)                        | VEGFR2/3, c-Kit and PDGFR $\alpha$            | Protein Tyrosine Kinase signaling        |
| <b>Temsirolimus (Torisel)</b>                  | <b>mTOR</b>                                   | <b>PI3K-AKT-mTOR-signaling</b>           |
| TG100-115                                      | PI3K $\gamma/\delta$                          | PI3K-AKT-mTOR-signaling                  |
| TG101209                                       | JAK2                                          | JAK-STAT-signaling                       |
| TGX-221                                        | p110 $\beta$                                  | PI3K-AKT-mTOR-signaling                  |
| Tivozanib (AV-951)                             | VEGFR1/2/3                                    | Protein Tyrosine Kinase signaling        |
| <b>Tofacitinib citrate (CP-690550 citrate)</b> | <b>JAK3</b>                                   | <b>JAK-STAT-signaling</b>                |
| TSU-68                                         | PDGFR                                         | Protein Tyrosine Kinase signaling        |
| U0126-EtOH (UO126 EtOH)                        | MEK1/2                                        | MAPK-signaling                           |
| Vandetanib (Zactima)                           | VEGFR2                                        | Protein Tyrosine Kinase signaling        |
| Vatalanib dihydrochloride (PTK787)             | VEGFR2/KDR                                    | Protein Tyrosine Kinase signaling        |
| <b>VX-680 (MK-0457, Tozasertib)</b>            | <b>Aurora A</b>                               | <b>Cell-cycle-signaling</b>              |
| <b>VX-702</b>                                  | <b>p38<math>\alpha</math> MAPK</b>            | <b>MAPK-signaling</b>                    |
| <b>VX-745</b>                                  | <b>p38<math>\alpha</math> MAPK</b>            | <b>MAPK-signaling</b>                    |
| WAY-600                                        | mTOR                                          | PI3K-AKT-mTOR-signaling                  |
| <b>WP1130</b>                                  | <b>deubiquitinase</b>                         | <b>Angiogenesis-signaling</b>            |
| <b>WYE-125132</b>                              | <b>mTOR</b>                                   | <b>PI3K-AKT-mTOR-signaling</b>           |
| <b>WYE-354</b>                                 | <b>mTOR</b>                                   | <b>PI3K-AKT-mTOR-signaling</b>           |
| WYE-687                                        | mTOR                                          | PI3K-AKT-mTOR-signaling                  |
| <b>WZ3146</b>                                  | <b>EGFR</b>                                   | <b>Protein Tyrosine Kinase signaling</b> |
| WZ4002                                         | EGFR                                          | Protein Tyrosine Kinase signaling        |
| <b>WZ8040</b>                                  | <b>EGFR T790M</b>                             | <b>Protein Tyrosine Kinase signaling</b> |
| XL147                                          | PI3K $\alpha/\delta/\gamma$                   | PI3K-AKT-mTOR-signaling                  |
| XL-184 free base (Cabozantinib)                | VEGFR2                                        | Protein Tyrosine Kinase signaling        |
| XL765                                          | p110 $\gamma$                                 | PI3K-AKT-mTOR-signaling                  |
| ZM 336372                                      | c-Raf                                         | MAPK-signaling                           |
| <b>ZM-447439</b>                               | <b>Aurora A and Aurora B</b>                  | <b>Cell-cycle-signaling</b>              |
| <b>ZSTK474</b>                                 | <b>PI3K</b>                                   | <b>PI3K-AKT-mTOR-signaling</b>           |

<sup>1</sup> Kinase Inhibitor Library (Catalog no. L1200) from Selleck Chemicals (Houston, Texas, <http://selleckchem.com>)
